# Supplementary material for: Home Oxygen Therapy for Adults with Chronic Lung Disease. An Official American Thoracic Society Clinical Practice Guideline
Source: PubMed Central journal article supplement — Am J Respir Crit Care Med. 2020 Nov 15;202(10):e121–41. doi: 10.1164/rccm.202009-3608ST (PMC7667898; doi:10.1164/rccm.202009-3608st), 2020-11-15
Supplement: rccm.202009-3608ST_executive_summary.pdf [file rccm.202009-3608ST_executive_summary.pdf]

# AMERICAN THORACIC SOCIETY DOCUMENTS

## Home Oxygen Therapy for Adults with Chronic Lung Disease An Official American Thoracic Society Clinical Practice Guideline: Executive Summary

Susan S. Jacobs, Jerry A. Krishnan, David J. Lederer, Marya Ghazipura, Tanzib Hossain, Ai-Yui M. Tan, Brian Carlin, M. Bradley Drummond, Magnus Ekström, Chris Garvey, Bridget A. Graney, Beverly Jackson, Thomas Kallstrom, Shandra L. Knight, Kathleen Lindell, Valentin Prieto-Centurion, Elisabetta A. Renzoni, Christopher J. Ryerson, Ann Schneidman, Jeffrey Swigris, Dona Upson, and Anne E. Holland; on behalf of the American Thoracic Society Assembly on Nursing

THIS OFFICIAL CLINICAL PRACTICE GUIDELINE OF THE AMERICAN THORACIC SOCIETY WAS APPROVED SEPTEMBER 2020

**Background:** Evidence-based guidelines are needed for effective delivery of home oxygen therapy to appropriate patients with chronic obstructive pulmonary disease (COPD) and interstitial lung disease (ILD).

**Methods:** The multidisciplinary panel created six research questions using a modified Delphi approach. A systematic review of the literature was completed, and the Grading of Recommendations Assessment, Development and Evaluation approach was used to formulate clinical recommendations.

**Recommendations:** The panel found varying quality and availability of evidence and made the following judgments: 1) strong recommendations for long-term oxygen use in patients with COPD (moderate-quality evidence) or ILD (low-quality evidence) with severe chronic resting hypoxemia, 2) a conditional recommendation against long-term oxygen use in patients with COPD with moderate

chronic resting hypoxemia, 3) conditional recommendations for ambulatory oxygen use in patients with COPD (low-quality evidence) or ILD (low-quality evidence) with severe exertional hypoxemia, 4) a conditional recommendation for ambulatory liquid-oxygen use in patients who are mobile outside the home and require >3 L/min of continuous-flow oxygen during exertion (very-low-quality evidence), and 5) a recommendation that patients and their caregivers receive education on oxygen equipment and safety (best-practice statement).

**Conclusions:** These guidelines provide the basis for evidence-based use of home oxygen therapy in adults with COPD or ILD but also highlight the need for additional research to guide clinical practice.

**Keywords:** mobility; hypoxemia; quality of life; chronic obstructive pulmonary disease; interstitial lung disease

|                                                                                               |                                                                                                                                     |                                                                                                                                                                         |
|-----------------------------------------------------------------------------------------------|-------------------------------------------------------------------------------------------------------------------------------------|-------------------------------------------------------------------------------------------------------------------------------------------------------------------------|
| <b>Contents</b>                                                                               |                                                                                                                                     |                                                                                                                                                                         |
| <b>Summary of Recommendations</b>                                                             | <b>chronic resting room air hypoxemia?</b>                                                                                          | <b>chronic resting room air hypoxemia?</b>                                                                                                                              |
| <b>Chronic Obstructive Pulmonary Disease</b>                                                  | <b>Question 2: Should long-term oxygen be prescribed for adults with COPD who have moderate chronic resting room air hypoxemia?</b> | <b>Question 5: Should ambulatory oxygen be prescribed to adults with ILD who have severe exertional room air hypoxemia?</b>                                             |
| <b>Interstitial Lung Disease</b>                                                              | <b>Question 3: Should ambulatory oxygen be prescribed for adults with COPD who have severe exertional room air hypoxemia?</b>       | <b>Question 6: Should portable LOX be provided for adults with chronic lung disease who are prescribed continuous oxygen flow rates of &gt;3 L/min during exertion?</b> |
| <b>Liquid Oxygen</b>                                                                          | <b>Question 4: Should long-term oxygen be prescribed for adults with ILD who have severe</b>                                        | <b>Panel Discussion</b>                                                                                                                                                 |
| <b>Education and Safety</b>                                                                   |                                                                                                                                     | <b>ATS Recommendation</b>                                                                                                                                               |
| <b>Introduction</b>                                                                           |                                                                                                                                     | <b>Conclusions</b>                                                                                                                                                      |
| <b>Methods</b>                                                                                |                                                                                                                                     |                                                                                                                                                                         |
| <b>Results</b>                                                                                |                                                                                                                                     |                                                                                                                                                                         |
| <b>Question 1: Should long-term oxygen be prescribed for adults with COPD who have severe</b> |                                                                                                                                     |                                                                                                                                                                         |

ORCID IDs: 0000-0002-8808-0038 (S.S.J.); 0000-0001-5525-4778 (J.A.K.); 0000-0001-5258-0228 (D.J.L.); 0000-0003-4328-6822 (M.G.); 0000-0002-1995-7828 (T.H.); 0000-0003-1271-8792 (A.-Y.M.T.); 0000-0002-6968-4610 (M.B.D.); 0000-0002-7227-5113 (M.E.); 0000-0002-8239-9427 (B.A.G.); 0000-0002-4404-3833 (S.L.K.); 0000-0002-3964-5063 (K.L.); 0000-0002-1118-797X (E.A.R.); 0000-0003-1049-393X (C.J.R.); 0000-0002-2643-8110 (J.S.); 0000-0002-6310-3520 (D.U.); 0000-0003-2061-845X (A.E.H.).

Am J Respir Crit Care Med Vol 202, Iss 10, pp 1345–1359, Nov 15, 2020  
Copyright © 2020 by the American Thoracic Society  
DOI: 10.1164/rccm.202009-3608ST  
Internet address: www.atsjournals.org

## Summary of Recommendations

### Chronic Obstructive Pulmonary Disease

- In adults with chronic obstructive pulmonary disease (COPD) who have severe chronic resting room air hypoxemia,\* we recommend prescribing long-term oxygen therapy (LTOT) for at least 15 h/d (*strong recommendation, moderate-quality evidence*).

\*Severe hypoxemia is defined as meeting either of the following criteria: 1)

$Pa_{O_2} \leq 55$  mm Hg (7.3 kPa) or oxygen saturation as measured by pulse oximetry ( $Sp_{O_2} \leq 88\%$ ); 2)  $Pa_{O_2} = 56$ – $59$  mm Hg (7.5–7.9 kPa) or  $Sp_{O_2} = 89\%$  plus one of the following: edema, hematocrit  $\geq 55\%$ , or P pulmonale on an ECG.

- In adults with COPD who have moderate chronic resting room air hypoxemia,\* we suggest not prescribing LTOT (*conditional recommendation, low-quality evidence*).

\*Moderate hypoxemia is defined as an  $Sp_{O_2}$  of 89–93%.

- In adults with COPD who have severe exertional room air hypoxemia, we suggest prescribing ambulatory oxygen (*conditional recommendation, low-quality evidence*).

### Interstitial Lung Disease

- For adults with interstitial lung disease (ILD) who have severe chronic resting room air hypoxemia, we recommend prescribing LTOT for at least 15 h/d (*strong recommendation, very-low-quality evidence*).
- For adults with ILD who have severe exertional room air hypoxemia, we suggest prescribing ambulatory oxygen (*conditional recommendation, low-quality evidence*).

### Liquid Oxygen

- In patients with chronic lung disease who are mobile outside of the home

and require continuous oxygen flow rates of  $>3$  L/min during exertion, we suggest prescribing portable liquid oxygen (LOX) (*conditional recommendation, very-low-quality evidence*).

### Education and Safety

- For patients prescribed home oxygen therapy, we recommend that the patient and their caregivers receive instruction and training on the use and maintenance of all oxygen equipment and education on oxygen safety, including smoking cessation, fire prevention, and tripping hazards (*best-practice statement*).

## Introduction

Five million adults live with chronic lung disease in the United States, with more than one million prescribed LTOT (1, 2), defined as oxygen prescribed for at least 15 h/d. The rationale for the provision of LTOT in adults is based on the survival benefit reported by two randomized clinical trials (RCTs) published over three decades ago that examined the effect on mortality of home oxygen therapy in patients with severe COPD and hypoxemia (3, 4). Since then, an additional clinical trial has examined the role of home oxygen therapy in patients with COPD and moderate resting hypoxemia or exertion-only hypoxemia (LOTT [Long-Term Oxygen Therapy Trial]) (5).

Although several professional societies and groups have published clinical practice guidelines for home oxygen therapy (6–12), most have not incorporated the recent LOTT results. Recent data highlight differences in home oxygen needs and experiences across different lung diseases, lifestyles, and oxygen supply requirements (13–16). For example, the physiologic mechanisms of hypoxemia differ between obstructive and restrictive lung diseases. The rapid and steep rate of

exertional desaturation for patients with ILD differs from that of those with COPD (17, 18). These considerations highlight the need for guidelines specific to individuals with COPD and ILD, the two major diagnoses for which oxygen therapy is prescribed (19).

The 2017 American Thoracic Society (ATS) workshop on optimizing home oxygen therapy identified the lack of evidence-based clinical practice guidelines for appropriate use of home oxygen as a critical gap (20). Workshop proceedings suggested a need for additional research on portable oxygen technology, advocacy for improved financing of oxygen therapy, and updated guidelines for policy, advocacy, and practice. The purpose of this guideline panel was to develop clinical guidelines targeting healthcare providers who care for adults living with chronic lung disease who need oxygen in the community, outside of inpatient and emergency settings.

## Methods

This clinical guideline was developed in accordance with policies and procedures of the ATS. The guideline included 4 co-chairs and 18 voting members: 11 pulmonary/critical care physicians, 4 nurses, 1 registered respiratory therapist, 1 physiotherapist, and 1 patient representative (Box 1). We used the Grading of Recommendations Assessment, Development and Evaluation approach to appraise the quality of evidence and to formulate, write, and grade recommendations (Tables 1 and 2) (21). To facilitate interpretation of our recommendations, we adopted a published terminology for home oxygen therapy (Table 3) (22). For our systematic review, we defined severe hypoxemia as  $Sp_{O_2} \leq 88\%$  or  $Pa_{O_2} \leq 55$  mm Hg (7.3 kPa), moderate hypoxemia as having an  $Sp_{O_2}$  of 89–93% or a  $Pa_{O_2}$  56–60 mm Hg (7.5–8.0 kPa), and we defined severe exertional hypoxemia as an  $Sp_{O_2} \leq 88\%$ . However, we found substantial variability in definitions for severe hypoxemia

This Executive Summary is part of the full official ATS clinical practice guideline, which readers may access online at <http://www.atsjournals.org/doi/abs/10.1164/rccm.202009-3608ST>. Only the Executive Summary is appearing in the print edition of the *Journal*. The article of record, and the one that should be cited, is: Home Oxygen Therapy for Adults with Chronic Lung Disease: An Official American Thoracic Society Clinical Practice Guideline. *Am J Respir Crit Care Med* 2020;202:e121–e141.

Ⓐ You may print one copy of this document at no charge. However, if you require more than one copy, you must place a reprint order. Domestic reprint orders: amy.schrivner@sheridan.com; international reprint orders: louisamott@springer.com.

This is a corrected version of the article; it was updated on April 15, 2021. See erratum: *Am J Respir Care Med* 2021;203:1045–1046; <https://www.atsjournals.org/doi/full/10.1164/rccm.v203erratum7>.

Correspondence and requests for reprints should be addressed to Susan S. Jacobs, M.S., R.N., Division of Pulmonary, Allergy and Critical Care, Department of Medicine, Stanford University, 300 Pasteur Drive, Stanford, CA 94035. E-mail: [ssjpulm@stanford.edu](mailto:ssjpulm@stanford.edu).

This document has an online supplement, which is accessible from this issue's table of contents at [www.atsjournals.org](http://www.atsjournals.org).

**Box 1**

“The ability to get out of the house and continue my activities is top of the chart in importance! There is no way I want to become a couch potato . . . All the oxygen equipment was ‘dumped’ on me. I knew nothing and was in a daze. I am sure that the delivery guy gave me some instructions when it was delivered but I retained nothing. . . . My first concern was to find a better solution than the shoulder carry bag that the oxygen company provided. I needed to be hands free to play tennis. . . . I spent a couple of years perfecting my system of how to carry enough tanks to a tennis match (requires 6–8 tanks). I did a lot of Internet research to find carts or carrying cases for tanks. I have settled on a rolling cart that was designed to carry wine bottles to tasting parties. Perfect size for 6 tanks . . . It is a pain to have to plan out a day of activities with oxygen. What is the elevation, how far will I have to walk, how many tanks do I need, where can I recharge my POC [portable oxygen concentrator]? There may come a day when you can’t do these things so enjoy every minute you have. When I don’t get enough tanks it makes me mad as hell . . . I still do not let down my guard down around the supplier. I never know when their business decisions will again affect my life.”

—Supplemental home oxygen user

across studies. Thus, we also considered studies using different thresholds and reported the definitions used by study authors. We have provided suggested thresholds for hypoxemia in our conclusions. A detailed description of the methods is available in the online supplement.

**Results**

The final recommendations are summarized in Table 4, with the review of evidence and conclusions detailed below for each question.

**Question 1: Should long-term oxygen be prescribed for adults with COPD who have severe chronic resting room air hypoxemia?**

**Evidence.** The critical outcome for this question was mortality, and five studies were

assessed (3, 4, 23–25) (*see* Table E2 in the online supplement), only two of which were RCTs (3, 4). There was moderate-quality evidence on the effects of LTOT on mortality because of imprecision in estimating the treatment effects. The two RCTs defined severe resting hypoxemia as either a PaO<sub>2</sub> ≤ 55 mm Hg (7.3 kPa) or a PaO<sub>2</sub> ≤ 59 mm Hg (7.9 kPa) plus one of the following: edema, hematocrit ≥ 55%, or P pulmonale on ECG (3); or as PaO<sub>2</sub> 40–60 mm Hg (5.3 kPa) and at least one previous episode of ankle edema (4). The NOTT (Nocturnal Oxygen Therapy Trial) (3) indicated a 2-year mortality-risk reduction of 55% in those prescribed continuous LTOT (24 h/d) compared with only nocturnal oxygen (relative risk, 0.45; 95% confidence interval [CI], 0.25–0.81). The MRC (Medical Research Council) study (4) indicated a 5-year mortality-risk

reduction of 59% in those with LTOT (15 h/d) compared with no oxygen (relative risk, 0.41; 95% CI, 0.17–0.98). Data from the NOTT and MRC studies were not pooled because of differences in definitions of severe hypoxemia, durations of home oxygen therapy, comparators, time points of measurement, and populations. In the NOTT study (3), LTOT improved survival compared with nocturnal oxygen in patients with a higher PaCO<sub>2</sub>, lower arterial pH, lower FVC, more severe nocturnal hypoxemia, lower hematocrit, lower mean pulmonary arterial pressure (PAP), and lower pulmonary vascular resistance (PVR). The NOTT authors were surprised to find smaller, nonsignificant differences in mortality between treatment groups in participants with higher baseline hematocrit, pulmonary arterial pressure, or PVR (3). Of note, however, the direction in the trend toward improved mortality in these individuals was similar to the trend in those with less impaired hemodynamics, and the mean PAP threshold used to separate subgroups (overall group median) was higher than the one used in the currently accepted definition of pulmonary hypertension. The MRC study did not report mortality benefits according to baseline characteristics (4). There was very-low-quality evidence on the effects of LTOT on healthcare use (24, 25). No study that met our inclusion criteria directly reported on the other important outcomes of dyspnea, fatigue, health-related quality of life (HRQL), exercise capacity, or physical activity in patients who received LTOT versus no LTOT.

For the outcome of safety, the systematic review identified cases of fires, burns from smoking around oxygen equipment, nosebleeds, and tripping over the equipment (26). The LOTT trial, the largest study of LTOT to date, found that for every 100 person-years, the rate of fires was 0.08, the rate of burns from smoking around oxygen equipment was 0.12, the rate of burns from oxygen around an open flame was 0.04, the rate of burns from LOX frost was 0.16, the rate of nosebleeds was 0.35, and the rate of tripping/falling over oxygen equipment was 0.90 (5). For all COPD Medicare beneficiaries who used home oxygen, those who had an emergency room visit for a burn injury were twice as likely to be prescribed oxygen in the preceding 90 days compared with those without burn injury (27).

**Table 1.** Certainty of Evidence

| Evidence Quality | Definition                                                                                                                                   |
|------------------|----------------------------------------------------------------------------------------------------------------------------------------------|
| High             | High confidence that the estimated effect is close to the true effect.                                                                       |
| Moderate         | Moderate confidence that the estimated effect is close to the true effect, but with a chance that the true effect is considerably different. |
| Low              | Low confidence in the estimated effect. Higher likelihood that the true effect is considerably different from the estimated effect.          |
| Very low         | Very low confidence in the estimated effect. High likelihood that the true effect is considerably different from the estimated effect.       |

**Table 2.** Implications of Clinical Guideline Recommendations by Stakeholder

| Stakeholder  | Strong Recommendation                                                                                                                                                                                                                                                                                                                | Conditional Recommendation                                                                                                                                                                                                                                                                                                                                                                               |
|--------------|--------------------------------------------------------------------------------------------------------------------------------------------------------------------------------------------------------------------------------------------------------------------------------------------------------------------------------------|----------------------------------------------------------------------------------------------------------------------------------------------------------------------------------------------------------------------------------------------------------------------------------------------------------------------------------------------------------------------------------------------------------|
| Patient      | The majority of patients would want the recommended course of action in this situation, and only a small number would not.                                                                                                                                                                                                           | Many patients in this situation would prefer the recommendation, but a substantial number may not. This is an opportunity for shared decision-making between the clinician and patient.                                                                                                                                                                                                                  |
| Clinician    | Most individuals should receive the course of action that is recommended. There is a low chance that additional formal decision aids are needed to help individuals make decisions consistent with their values and preferences, and adherence to this recommendation could be used as a performance indicator or quality criterion. | Different choices will be applicable to different patients, and additional factors will need to be considered in addition to the recommendation in order for a patient to make a decision according to their values and preferences. Decision aids may be needed to assist individuals in making their best choice. This is an opportunity for shared decision-making between the clinician and patient. |
| Policy-maker | The recommendation can be widely adapted as policy and can be used for performance indicators.                                                                                                                                                                                                                                       | Policy-making will require substantial additional debate and involvement of many and/or additional stakeholders. The likelihood of regional variance is also higher, and performance indicators would need to take into consideration any additional deliberation that has occurred.                                                                                                                     |

**Conclusions.** The panel concluded that the balance of desirable and undesirable effects supported the use of LTOT in patients with COPD with severe resting hypoxemia. The size of the desirable anticipated effects of LTOT on mortality is large, with decreased 2-year and 5-year mortality (critical outcome). The NOTT trial (3) reported that patients with severe hypoxemia associated with ventilatory compromise (on the basis of  $P_{aCO_2}$ , arterial pH, and FVC) were more likely to benefit from LTOT and did not identify differences in mortality benefit according to pulmonary hemodynamics (on the basis of PVR and pulmonary arterial pressure), with a slightly larger benefit being shown in those with relatively milder hemodynamic disturbances. However, these were subgroup analyses, and similar analyses were not performed in the MRC study (4), so the panel concluded that there is insufficient evidence to recommend preferentially prescribing LTOT to specific subgroups of patients with COPD and severe hypoxemia.

LTOT comes with a moderate level of undesirable anticipated effects, including the physical and mental burden of using oxygen equipment, reduced ability to travel outdoors, difficulty accessing oxygen equipment during travel, and sleep disturbance from equipment noise (10, 28). The costs of implementation vary across geographic areas (29–33). The panel concluded that cost-effectiveness considerations probably favor the use of

LTOT, after placing high value on reducing mortality and lower value on cost and resource use. Severe hypoxemia was defined using different thresholds in the two RCTs ( $P_{aO_2} \leq 55$  mm Hg [7.3 kPa] or  $P_{aO_2} \leq 59$  mm Hg [7.9 kPa] plus one of the following: edema, hematocrit  $\geq 55\%$ , or P pulmonale on ECG [3]; vs.  $P_{aO_2}$  of 40–60 mm Hg [5.3–8.0 kPa] [4]). Because a mortality benefit was demonstrated in both studies, the panel concluded that either definition of severe hypoxemia is clinically justified. Neither clinical trial reported  $Sp_{O_2}$ -based thresholds for severe hypoxemia. We recognize that the relationship between  $Sp_{O_2}$  and  $P_{aO_2}$  can vary because of an individual's pH, 2,3-diphosphoglycerate levels,  $P_{aCO_2}$ , and temperature. However, the guideline panel concluded that providing approximate thresholds for  $Sp_{O_2}$  that correspond to the  $P_{aO_2}$  thresholds used in the NOTT and MRC studies would improve the usability of the guideline report in circumstances in which arterial blood-gas measurements were not available.

In addition, the two clinical trials used slightly different definitions of “chronic.” In the NOTT study (3), chronic was defined as meeting the definition of severe hypoxemia on “at least two occasions >1 week apart over a 3-week observation period” while the patient was free of exacerbations. In the MRC study (4), chronic was defined as meeting the  $P_{aO_2}$ -based criteria for hypoxemia on “two repeated measurements

at least 3 weeks apart.” For implementation purposes, we define chronic resting hypoxemia as resting hypoxemia in the absence of a reversible cause. Although the NOTT and MRC trials used definitions that required repeated measures 3 weeks apart, this may not be possible or necessary in clinical practice. Reassessment recommendations include retesting after exacerbation and also in the setting of chronic disease (Table 5).

The panel agreed that a target saturation of 90% was preferred, as opposed to 88% in some guidelines, to avoid prolonged episodes of desaturation with minimal activity.

**ATS recommendation.** In adults with COPD who have severe chronic resting room air hypoxemia, we recommend prescribing LTOT for at least 15 h/d (strong recommendation, moderate-quality evidence).

#### **Question 2: Should long-term oxygen be prescribed for adults with COPD who have moderate chronic resting room air hypoxemia?**

**Evidence.** For this question, mortality was the critical outcome. The panel concluded that the quality of evidence for mortality in patients with moderate chronic resting room air hypoxemia was low because of imprecision of estimated treatment effects. The LOTT study included participants who had moderate hypoxemia at rest (room

**Table 3.** Terminology for Home Oxygen Therapy

| Term                      | Definition                                                                                                                                                                                                                                                    |
|---------------------------|---------------------------------------------------------------------------------------------------------------------------------------------------------------------------------------------------------------------------------------------------------------|
| Ambulatory oxygen         | Oxygen delivered during exercise or activities of daily living.                                                                                                                                                                                               |
| Continuous-flow oxygen    | Oxygen delivered at a constant flow rate, regardless of the respiratory rate, in contrast to pulse-dose oxygen (see below).                                                                                                                                   |
| Continuous oxygen         | Oxygen prescribed 24 h/d.                                                                                                                                                                                                                                     |
| Home oxygen               | Oxygen delivered in a home, also known as domiciliary oxygen. It includes not only long-term oxygen but also short-term, nocturnal, palliative, ambulatory, and short-burst oxygen. It excludes oxygen use in healthcare and emergency settings.              |
| Long-term oxygen          | Oxygen that is delivered to patients with chronic hypoxemia, in most cases for the remainder of the patient's life. Long-term oxygen therapy is prescribed for at least 15 h/d.                                                                               |
| Nocturnal oxygen          | Oxygen delivered during sleep time only.                                                                                                                                                                                                                      |
| Palliative oxygen         | Oxygen to relieve dyspnea. Palliative oxygen may be provided continuously, nocturnally, or during ambulation. Short-burst oxygen therapy falls into this category.                                                                                            |
| Portable oxygen           | Oxygen delivered through systems that are sufficiently lightweight so that they can be carried or pulled by patients and allow them to leave their home (e.g., oxygen cylinders or canisters carried or pulled in trolleys or portable oxygen concentrators). |
| Pulse-dose oxygen         | Oxygen delivered during inspiration only in such a way that the quantity of oxygen administered is influenced by the respiratory rate. The delivery system is at rest while the patient is exhaling.                                                          |
| Short-burst oxygen        | Brief and intermittent oxygen administration before and/or after exercise, generally used as needed, in the absence of known hypoxemia.                                                                                                                       |
| Short-term oxygen therapy | Oxygen provided temporarily, during a period of severe hypoxemia (e.g., during the course of and shortly after an exacerbation of COPD).                                                                                                                      |

*Definition of abbreviation:* COPD = chronic obstructive pulmonary disease. There are several types of home oxygen therapy. This table is provided to assist in standardizing the terminology and is adapted by permission from Reference 22.

air SpO<sub>2</sub> of 89–93%, no PaO<sub>2</sub> threshold specified) and, after a change in study design during the trial because of low recruitment, also included participants who desaturated only with exertion (SpO<sub>2</sub> ≥ 80% for ≥5 min and <90% for ≥10 s during a 6-min-walk test [6MWT]) (5). At the request of the guideline panel, the LOTT group conducted additional analyses, comparing the risk of death with and without LTOT in the 419 participants with moderate hypoxemia at rest (57% of LOTT participants; Table E3). There was no difference between groups in time to death

(hazard ratio, 0.95; 95% CI, 0.59–1.50). There were similar findings in a previous RCT of 135 patients with COPD and a PaO<sub>2</sub> of 56–65 mm Hg (7.5–8.7 kPa) (34); the relative hazard of survival for no oxygen versus LTOT was 0.92 (95% CI, 0.57–1.47). The panel concluded that the quality of evidence for effects on HRQL with LTOT in patients with COPD and moderate hypoxemia was moderate. Improvements in St. George's Respiratory Questionnaire (SGRQ) favored the use of LTOT at 4-month follow-up in those with both moderate resting and exertional

desaturation (mean difference [MD], –3.30; 95% CI, –6.50 to –0.10), but no significant differences were found at 12 months. There were no differences between groups in the Quality of Well-Being Scale (5). Safety data from the LOTT trial (5) were reported in question 1.

**Conclusions.** The panel concluded that the balance of desirable and undesirable effects did not support use of LTOT for patients with moderate resting room air hypoxemia, on the basis of the available data. On the basis of the LOTT study, we defined moderate resting hypoxemia as an SpO<sub>2</sub> of 89–93%. The corresponding PaO<sub>2</sub> was not reported (5). The panel made a conditional recommendation against LTOT, placing high value on the absence of a proven mortality reduction and low value on short-term improvement in HRQL (observed at 4 mo but not 12 mo). The costs and burden of the treatment appear to outweigh the minimal benefit of LTOT on critical or important outcomes in adults with COPD with moderate resting room air hypoxemia. Therefore, discussions regarding prescribing continuous oxygen in this population offer opportunities for shared decision-making between the clinician and patient.

**ATS recommendation.** In adults with COPD who have moderate chronic resting room air hypoxemia, we suggest not prescribing LTOT (conditional recommendation, low-quality evidence).

**Question 3: Should ambulatory oxygen be prescribed for adults with COPD who have severe exertional room air hypoxemia?**

**Evidence.** For our critical outcome of HRQL, we examined studies that included patients with COPD who had severe isolated exertional desaturation (35–41) as well as those who had exertional desaturation but were eligible for LTOT (42–46) (Table E4). Overall, the quality of the evidence was low and included only two parallel-group RCTs of ambulatory oxygen (39, 46), of which only one included blinding to the intervention (39).

**Isolated exertional desaturation.** Meta-analysis of three studies (36, 39, 40) found a small but significant improvement in the dyspnea-related quality-of-life domain of the Chronic Respiratory Disease Questionnaire (standardized mean difference, 0.42; 95% CI, 0.04–0.79;

**Table 4.** Summary of ATS Recommendations

| Question                                                                                                                                                                | ATS Recommendation                                                                                                                                                                                                                                                                          | Strength of Recommendation and Level of Evidence      |
|-------------------------------------------------------------------------------------------------------------------------------------------------------------------------|---------------------------------------------------------------------------------------------------------------------------------------------------------------------------------------------------------------------------------------------------------------------------------------------|-------------------------------------------------------|
| <b>COPD</b>                                                                                                                                                             |                                                                                                                                                                                                                                                                                             |                                                       |
| Question 1: Should long-term oxygen be prescribed for adults with COPD who have severe* chronic resting room air hypoxemia?                                             | In adults with COPD who have severe chronic resting room air hypoxemia, we recommend prescribing LTOT for at least 15 h/d.                                                                                                                                                                  | Strong recommendation, moderate-quality evidence      |
| Question 2: Should long-term oxygen be prescribed for adults with COPD who have moderate† chronic resting room air hypoxemia?                                           | In adults with COPD who have moderate chronic resting room air hypoxemia, we suggest not prescribing LTOT.                                                                                                                                                                                  | Conditional recommendation, low-quality evidence      |
| Question 3: Should ambulatory oxygen be prescribed for adults with COPD who have severe exertional room air hypoxemia?                                                  | In adults with COPD who have severe exertional room air hypoxemia, we suggest prescribing ambulatory oxygen.                                                                                                                                                                                | Conditional recommendation, low-quality evidence      |
| <b>ILD</b>                                                                                                                                                              |                                                                                                                                                                                                                                                                                             |                                                       |
| Question 4: Should long-term oxygen be prescribed for adults with ILD who have severe chronic resting room air hypoxemia?                                               | For adults with ILD who have severe chronic resting room air hypoxemia, we recommend prescribing LTOT for at least 15 h/d.                                                                                                                                                                  | Strong recommendation, very-low-quality evidence      |
| Question 5: Should ambulatory oxygen be prescribed for adults with ILD who have severe exertional room air hypoxemia?                                                   | For adults with ILD who have severe exertional room air hypoxemia, we suggest prescribing ambulatory oxygen.                                                                                                                                                                                | Conditional recommendation, low-quality evidence      |
| <b>Liquid oxygen</b>                                                                                                                                                    |                                                                                                                                                                                                                                                                                             |                                                       |
| Question 6: Should portable liquid oxygen be provided for adults with chronic lung disease who are prescribed continuous oxygen flow rates of >3 L/min during exertion? | In patients with chronic lung disease who are mobile outside of the home and require continuous oxygen flow rates of >3 L/min during exertion, we suggest prescribing portable liquid oxygen.                                                                                               | Conditional recommendation, very-low-quality evidence |
| <b>Education</b>                                                                                                                                                        |                                                                                                                                                                                                                                                                                             |                                                       |
| Education and safety for patients and caregivers                                                                                                                        | For all patients prescribed home oxygen therapy, we recommend that the patient and their caregivers receive instruction and training on the use and maintenance of all oxygen equipment and education on oxygen safety, including smoking cessation, fire prevention, and tripping hazards. | Best-practice statement                               |

*Definition of abbreviations:* ATS = American Thoracic Society; COPD = chronic obstructive pulmonary disease; ILD = interstitial lung disease; LTOT = long-term oxygen therapy.

\*On the basis of two clinical trials, severe hypoxemia is defined as meeting either of the following criteria: 1) Pa<sub>O</sub><sub>2</sub> ≤ 55 mm Hg (7.3 kPa) or oxygen saturation as measured by pulse oximetry (Sp<sub>O</sub><sub>2</sub>) ≤ 88% or 2) Pa<sub>O</sub><sub>2</sub> = 56–59 mm Hg (7.5–7.9 kPa) or Sp<sub>O</sub><sub>2</sub> = 89% plus one of the following: edema, hematocrit ≥ 55%, or P pulmonale on an ECG.

†On the basis of a single clinical trial, moderate hypoxemia is defined as an Sp<sub>O</sub><sub>2</sub> of 89–93%. The corresponding Pa<sub>O</sub><sub>2</sub> was not reported in that study.

I<sup>2</sup> = 12%) in favor of ambulatory oxygen, but mean changes were generally less than the minimal clinically important difference (MCID) in all three studies (47). Improvements with oxygen in individual participants could not be predicted by sex, exercise response to hyperoxia, or severity of desaturation, airflow obstruction, or dyspnea (39). One study using the SGRQ found no difference between supplemental oxygen and compressed room air (40), whereas another using the 36-Item

Short-Form Health Survey (36) observed a significant difference in favor of ambulatory oxygen in multiple survey domains (48). The acute effects of oxygen on functional exercise capacity were assessed using multiple tests. Oxygen improved the 6-minute-walk distance by 28.9 m (95% CI, 16.1–41.9 m; I<sup>2</sup> = 0%) (36, 37), increased exercise endurance on a cycle ergometer by 5.8 minutes (95% CI, 2.23–9.37 min) (41), increased exercise capacity by 17.9 W (95% CI, 8.10–27.70 W) (38), and increased steps

walked on a 5-minute-walk test (14.9; 95% CI, 0.85–28.94) (40). We meta-analyzed the results of three studies reporting on the Borg dyspnea score at the end of exercise (36, 37, 41) and found a reduction of 1.11 U (95% CI, 0.53–1.69 U; I<sup>2</sup> = 39%) in favor of ambulatory oxygen (Borg MCID = 1.0 U) (49). No studies reported the long-term effects of ambulatory oxygen on exercise capacity beyond acute laboratory or field tests, and no studies reported effects on physical activity in daily life.

**Table 5.** ATS Recommendation: Education and Safety Considerations

**For patients prescribed home oxygen therapy, we recommend that the patient and their caregivers receive instruction and training on the use and maintenance of all oxygen equipment and education on oxygen safety, including smoking cessation, fire prevention, and tripping hazards (best-practice statement).**

|            |                                                                                                                                                                                                                                                                                                                                                                                                                                                                                                                                                                                                                                                        |
|------------|--------------------------------------------------------------------------------------------------------------------------------------------------------------------------------------------------------------------------------------------------------------------------------------------------------------------------------------------------------------------------------------------------------------------------------------------------------------------------------------------------------------------------------------------------------------------------------------------------------------------------------------------------------|
| Safety     | <ul style="list-style-type: none"> <li>• Provide safety education to patients and caregivers regarding tripping and falls, decreasing fire risk by not smoking or allowing smoking inside the home, the use of inline devices, avoidance of activities around an open flame or spark, and the use of nonpetroleum nasal products.*†</li> <li>• Instruct liquid-oxygen users on avoidance of skin burns from contact with frosted parts on liquid-oxygen-device connectors.‡</li> <li>• Provide guidance on transporting and traveling safely with oxygen.</li> <li>• Confirm the presence of back-up devices for emergencies or power loss.</li> </ul> |
| Smoking    | <ul style="list-style-type: none"> <li>• Instruct current smokers or caregiver smokers on treatment of tobacco dependence and refer to appropriate resources.</li> <li>• In some regions, smoking is an absolute contraindication to home oxygen therapy<sup>§</sup>. One guideline suggests advising the patient that oxygen provides limited clinical benefit for those who continue to smoke.<sup>  </sup></li> <li>• Alert patients and caregivers that use of e-cigarettes, or vaping, is associated with burn accidents in e-cigarette smokers receiving home oxygen therapy.<sup>¶</sup></li> </ul>                                             |
| Education  | <ul style="list-style-type: none"> <li>• Tailor patients' education to their health literacy and cultural contexts.</li> <li>• Incorporate effective evaluation and return demonstration of their ability to use their prescribed devices both in the home and in ambulatory settings.</li> <li>• Instruct patients and caregivers on troubleshooting equipment problems.</li> <li>• Consider access to appropriate equipment on the basis of patients' physical, physiologic, and lifestyle/mobility needs.</li> </ul>                                                                                                                                |
| Monitoring | <ul style="list-style-type: none"> <li>• Reassess patients' oxygen needs, acknowledging that the frequency would vary by disease characteristics, such as rate of progression. Clinical support for monitoring at home by nurses and respiratory therapists is rare in the United States but common in other regions.**</li> <li>• Reassess oxygen needs for patients who are newly prescribed oxygen after hospital discharge to confirm ongoing oxygen requirements.<sup>††</sup></li> <li>• Advise patients to bring their portable device to healthcare visits to assess its effectiveness and to reinforce self-management.</li> </ul>            |

*Definition of abbreviation:* e-cigarette = electronic cigarette.  
 \*Reported in safety findings of LOTT (Long-Term Oxygen Treatment Trial) (5, 26).  
 †Risk of burn injury reported in 17-year national study in Sweden (5, 26).  
 ‡Apria Patient/Caregiver Instructions—Liquid Oxygen (86).  
 §Thoracic Society of Australia and New Zealand Clinical Practice Guidelines on Adult Domiciliary Oxygen (9).  
 ||British Thoracic Society guidelines for home oxygen use in adults (93).  
 ¶Described in a study on home oxygen programs and funding in Canada (10, 94).  
 \*\*Home support noted in 29-year prospective long-term oxygen therapy data (19).  
 ††Data on patient recovery from hypoxemia in patients with chronic obstructive pulmonary disease after hospital discharge (95) and importance of retesting (96).

**Resting and exertional hypoxemia.**

Six RCTs (42–46, 50) met our inclusion criteria; however, none included results for our critical outcome of HRQL. In one randomized crossover study of LTOT users, ambulatory oxygen had no effect on dyspnea (51). Ambulatory oxygen acutely increased the distance patients walked in 12 minutes if not carrying walkers or shopping trolleys (42), acutely improved the distance walked on the incremental shuttle walk test (MD, 27.3 m; 95% CI,

14.7–39.8 m) (50), and acutely improved endurance time by 4.70 minutes compared with room air (95% CI, 3.76–5.64 min) (45). We meta-analyzed the results from three studies reporting on the Borg dyspnea score (44, 45, 50) and found a reduction of 0.59 U (95% CI, 0.18–0.99 U;  $I^2 = 25\%$ ) in favor of ambulatory oxygen.

There is also a substantial body of evidence regarding the patient and caregiver burden associated with the use of ambulatory

oxygen, including managing the equipment, being embarrassed using it outside the home, fear of cylinders running out, reduced ability to travel, equipment noise that may affect social activities, difficulty obtaining portable oxygen concentrators, and poor access to information about effective use of oxygen equipment (14, 52, 53).

**Conclusions.** For people with COPD and severe exertional hypoxemia, we did not find consistent evidence that ambulatory oxygen delivered clinically significant improvements in the critical outcome of HRQL, whereas effects generally favored ambulatory oxygen (low Grading of Recommendations Assessment, Development and Evaluation evidence). In studies examining the acute effects of oxygen during exercise testing, there were clinically significant improvements in endurance time and walk distance. Improvements in exercise capacity were seen both in those with isolated exertional hypoxemia and in those eligible for LTOT. The effects of ambulatory oxygen on dyspnea during exercise testing were inconsistent. Effects on mortality, fatigue, and physical activity in daily life were not reported. We defined exertional hypoxemia as an  $SpO_2 \leq 88\%$ . In patients who are eligible for LTOT, prescription of ambulatory oxygen may be important to increase the daily hours of oxygen usage (54). Standardization of the level of exertion is critical when assessing the effects of oxygen on dyspnea (55, 56). This recommendation places a high value on increasing HRQL and the potential for facilitating physical activity outside the home and places a lower value on cost, inconvenience, and resource use.

**ATS recommendation.** In adults with COPD who have severe exertional room air hypoxemia, we suggest prescribing ambulatory oxygen (conditional recommendation, low-quality evidence).

**Question 4: Should long-term oxygen be prescribed for adults with ILD who have severe chronic resting room air hypoxemia?**

**Evidence.** For the critical outcome of mortality, no studies were found that met all of our inclusion criteria. A 2001 Cochrane systematic review (57) reported the results from one unpublished RCT in which severe resting hypoxemia was defined as a  $PaO_2$  of

45–60 mm Hg (6.0–8.0 kPa), slightly above our prespecified cutoff of a  $\text{PaO}_2 \leq 55$  mm Hg (73 kPa) (Table E5). There was no significant difference in mortality between the LTOT and room air groups after 1 year (odds ratio [OR], 0.50; 95% CI, 0.15–1.61), 2 years (OR, 1.76; 95% CI, 0.64–4.86), or 3 years (OR, 0.99; 95% CI, 0.16–6.26). As conclusions about mortality are based on one unpublished RCT, the quality of evidence was very low (Table E5). Because of the paucity of any direct evidence on patients with ILD, we chose to consider indirect evidence from our first population, intervention, comparison, and outcome question, which considered patients with COPD and severe resting hypoxemia (6, 58–60).

Safety data in ILD were scarce but included a qualitative study in patients with idiopathic pulmonary fibrosis, noting tripping as a hardship after being on oxygen for 9–12 months (61). The panel agreed that the safety data for patients with COPD on LTOT would be similar for patients with ILD on LTOT.

**Conclusions.** The panel judged the perceived benefits of LTOT to treat severe chronic resting hypoxemia to be substantial for most adults living with ILD, on the basis of indirect evidence from trials in COPD. LTOT for severe resting hypoxemia may confer a survival benefit and prevent organ dysfunction due to severe sustained hypoxemia, including the prevention of pulmonary hypertension. Other benefits may include relief of breathlessness as well as improvements in disability and HRQL. The primary undesirable consequences are listed in question 1. Overall, the panel deemed the substantial desirable consequences of LTOT to outweigh the undesirable consequences of untreated severe resting hypoxemia. Despite the very-low-quality evidence available to the panel, ethical concerns about withholding LTOT were strong factors in our decision-making. Other guidelines similarly base recommendations on COPD evidence (7, 62). For patients with ILD, we have applied the same definition of severe resting hypoxemia as was applied for those with COPD (question 1). The assessment of pulmonary hypertension should be considered, as it is a predictor of increased mortality in patients with idiopathic pulmonary fibrosis and is also a predictor of worsening lung function, worsening functional status, increased oxygen needs, and increased risk of acute exacerbation (6, 58–60).

**ATS recommendation.** For adults with ILD who have severe chronic resting room air hypoxemia, we recommend prescribing LTOT for at least 15 h/d (strong recommendation, very-low-quality evidence).

#### Question 5: Should ambulatory oxygen be prescribed to adults with ILD who have severe exertional room air hypoxemia?

**Evidence.** The quality of evidence was low, with no parallel-group RCTs and only one study, the AmbOx (Ambulatory Oxygen in Fibrotic Lung Disease) trial (63), reporting the effects of ambulatory oxygen used during daily activities. In this randomized, 2-week, unblinded, crossover trial in patients with fibrotic ILD with isolated exertional hypoxemia ( $\text{SpO}_2 \leq 88\%$ ), a significant improvement in the King's Brief ILD questionnaire was found in favor of ambulatory oxygen for the total score (MD, 3.7; 95% CI, 1.8 to 5.6), breathlessness/activities score (MD, 8.6; 95% CI, 4.7 to 12.5), and chest symptoms score (MD, 7.6; 95% CI, 1.9 to 13.2). The MCID for the total score is 3.9 points (64, 65). There was also a significant improvement in the SGRQ total score (MD,  $-3.6$ ; 95% CI,  $-6.7$  to  $-0.6$ ) and activity score (MD,  $-7.5$ ; 95% CI,  $-12.4$  to  $-2.5$ ), with the MCID for the SGRQ being 4 U (66). Dyspnea with activities of daily living was assessed using The University of California, San Diego, Shortness of Breath Questionnaire, showing a decrease by 8 U (95% CI, 3.6 to 12.4 U). The MCID is 5 U (63, 67). Despite the clear challenges posed by ambulatory oxygen, also highlighted in the qualitative component of the trial, two-thirds of patients decided to continue with ambulatory oxygen at the end of the study.

A 2016 Cochrane systematic review (68) found no benefits of ambulatory oxygen over room air in patients with ILD for change in 6-minute-walk distance, the endurance shuttle walk test, or the Borg dyspnea score. One study reported an acute improvement in endurance time by 118.7 seconds (95% CI, 23.9 to 213.5 s) (69) with ambulatory oxygen. Meta-analysis of three newer studies showed that ambulatory oxygen acutely improved 6-minute-walk distance by 18.57 m (95% CI, 11.14 to 25.99 m;  $I^2 = 0\%$ ) compared with room or cylinder air (Table E6) and reduced the Borg perceived-exertion score (0.37 U; 95% CI, 0.19 to 0.54 U;  $I^2 = 0\%$ ), but no significant difference was found regarding the Borg dyspnea score

(MD,  $-0.72$ ; 95% CI,  $-1.70$  to  $0.27$ ;  $I^2 = 73.28\%$ ) (63, 70, 71). Oxygen increased exercise duration by 57.67 seconds (95% CI, 0.22 to 115.12 s;  $I^2 = 0\%$ ) without significant improvement in the maximal work rate (MD, 10.34 W; 95% CI,  $-3.59$  to  $24.26$  W;  $I^2 = 0\%$ ) in participants undergoing cardiopulmonary exercise testing (72, 73).

The Cochrane review did not report any serious adverse events or side effects (68). However, the panel agreed that risks of transporting cylinders, burns, fires, and tripping would be potential safety concerns for patients with ILD using oxygen during exertion within and outside the home.

**Conclusions.** Weak evidence supports the use of ambulatory oxygen in people with ILD because of the benefit to HRQL, but certainty is low, as the medium- to long-term effects are unknown. In laboratory studies, the improvements in exercise capacity tended to favor ambulatory oxygen but were generally small, and effects on physical activity in daily life were not examined. Qualitative studies undertaken in patients with ILD report negative physical and psychosocial impacts of ambulatory oxygen therapy that persist despite acceptance that ambulatory oxygen may be inevitable as disease progresses (74). Patients and caregivers report that there may be unmet expectations for symptom relief (particularly with regard to dyspnea), challenges related to the use of cumbersome or complicated equipment, embarrassment when using ambulatory oxygen in public, reduced independence for patients, and increased caregiver burden, marking an important trade-off between benefits and inconvenience (61, 74, 75). Therefore, it is likely that some patients will choose not to use ambulatory oxygen. We defined exertional hypoxemia as an  $\text{SpO}_2 \leq 88\%$ .

**ATS recommendation.** For adults with ILD who have severe exertional room air hypoxemia, we suggest prescribing ambulatory oxygen (conditional recommendation, low-quality evidence).

#### Question 6: Should portable LOX be provided for adults with chronic lung disease who are prescribed continuous oxygen flow rates of >3 L/min during exertion?

**Evidence.** Three modes of portable oxygen delivery are available for patients' use



**Table 6.** Characteristics of Portable Oxygen Devices

|                                                        | Metal Oxygen Cylinders                                                                                                                                                                                                                                                                                                                                                                                                                                                                                                                                         | POCs                                                                                                                                                                                                                                                                                                                               | LOX                                                                                                                                                                                                                                                                          |
|--------------------------------------------------------|----------------------------------------------------------------------------------------------------------------------------------------------------------------------------------------------------------------------------------------------------------------------------------------------------------------------------------------------------------------------------------------------------------------------------------------------------------------------------------------------------------------------------------------------------------------|------------------------------------------------------------------------------------------------------------------------------------------------------------------------------------------------------------------------------------------------------------------------------------------------------------------------------------|------------------------------------------------------------------------------------------------------------------------------------------------------------------------------------------------------------------------------------------------------------------------------|
| Size and weight                                        | Available in multiple sizes from 2.5 to 9 kg (E cylinder in United States, which requires a trolley)*                                                                                                                                                                                                                                                                                                                                                                                                                                                          | Vary in weight (1.5–10 kg), noise, battery life, oxygen purity (87–95%), maximum breath rates, and settings (pulse flow, continuous flow, or both) <sup>††</sup>                                                                                                                                                                   | Medium to large canister ranges between 2.5 and 4 kg                                                                                                                                                                                                                         |
| Filling                                                | Some stationary concentrators allow patients to fill smaller oxygen cylinders in their home, (home-fill units), but these last <1 h on continuous-flow rates >3 L/min and therefore are inadequate for high-flow patients                                                                                                                                                                                                                                                                                                                                      | No filling; POCs “concentrate” oxygen by extracting nitrogen from ambient air. They run off of a battery and can be recharged                                                                                                                                                                                                      | Patients refill portable canisters from a larger home reservoir of LOX<br>One liter of LOX expands to 860 L of gaseous oxygen                                                                                                                                                |
| Pulse setting or continuous-flow capacity <sup>§</sup> | Oxygen-conserving devices using pulse-flow technology can be attached to metal cylinders to prolong the duration of supply by releasing oxygen only during inspiration<br>Because of differences in an individual patient’s ability to trigger a pulse dose of oxygen, and the volume delivered with each pulse at different respiratory rates, they may be insufficient for patients who require continuous oxygen with exertion at >3 L/min, such as those with interstitial lung disease, lung transplantation candidates, and others with severe hypoxemia | At a given pulse-flow setting, POCs differ as to the volume of oxygen (ml) per pulse, inspiratory time, and triggering sensitivity and may not consistently sense patients’ inspiratory efforts to trigger the device*<br>Pulse settings are based on an oxygen volume unique to each device, not a standardized L/min methodology | Portable LOX technology allows delivery of continuous-flow oxygen up to 15 L/min via a lighter and longer-duration device                                                                                                                                                    |
| Duration of supply                                     | A single E tank with a stroller will last approximately 1.9 h on 6 L/min. Multiple cylinders are needed for high-flow (>3 L/min) patients to be out of the home >2–4 h <sup>  </sup>                                                                                                                                                                                                                                                                                                                                                                           | All POCs depend on a battery supply that depletes more rapidly with higher settings, higher respiratory rates, and the use of continuous-flow settings                                                                                                                                                                             | A medium LOX canister will last 3 h at 6 L/min of continuous flow                                                                                                                                                                                                            |
| Cost                                                   | Metal oxygen cylinders range from US\$50 to US\$100; additional costs for a regulator or oxygen-conserving device. Commonly supplied by U.S. DME companies                                                                                                                                                                                                                                                                                                                                                                                                     | In the United States, many DME companies offer POCs as a portable option together with a stationary concentrator; individuals can also purchase them for US\$2,000–4,000                                                                                                                                                           | Cost estimates are approximately four times higher per patient compared with POCs or metal-cylinder options because of the requirements for DME companies to access and store LOX, use specially outfitted delivery trucks, and provide weekly refill servicing <sup>¶</sup> |
| Travel                                                 | Metal cylinders not allowed for air travel                                                                                                                                                                                                                                                                                                                                                                                                                                                                                                                     | POCs are the only carry-on portable oxygen device allowed by the Federal Aviation Administration for air travel; some airlines may provide oxygen cylinders for emergency in-flight use only**                                                                                                                                     | Liquid oxygen not allowed for air travel                                                                                                                                                                                                                                     |

*Definition of abbreviations:* DME = durable medical equipment; LOX = liquid oxygen; POCs = portable oxygen concentrators.

\*The availability of different oxygen devices varies by geographic region, and some jurisdictions do not have smaller metal oxygen cylinders.

<sup>†</sup>POCs vary in pulse technology, oxygen purity, and triggering sensitivity (78, 87–91).

<sup>‡</sup>The few POCs that currently provide a maximum of 3 L/min on a continuous-flow setting weigh over 9 kg and require a trolley.

<sup>§</sup>For all devices, if an oxygen-conserving device is used, the patient should be tested using that device during exertion, similar to what they would do in daily life, to ensure adequate oxygenation. A continuous-flow setting of 5 L/min and a pulse-flow setting of “5” may not deliver equivalent volumes of oxygen, despite direct marketing claims.

<sup>||</sup>Patients depend on their DME company to deliver an adequate number of cylinders per week or month.

<sup>¶</sup>LOX costs are higher than costs for POCs or metal cylinders (81).

\*\*The Federal Aviation Administration stipulates which POCs are allowed for use during air travel (92).

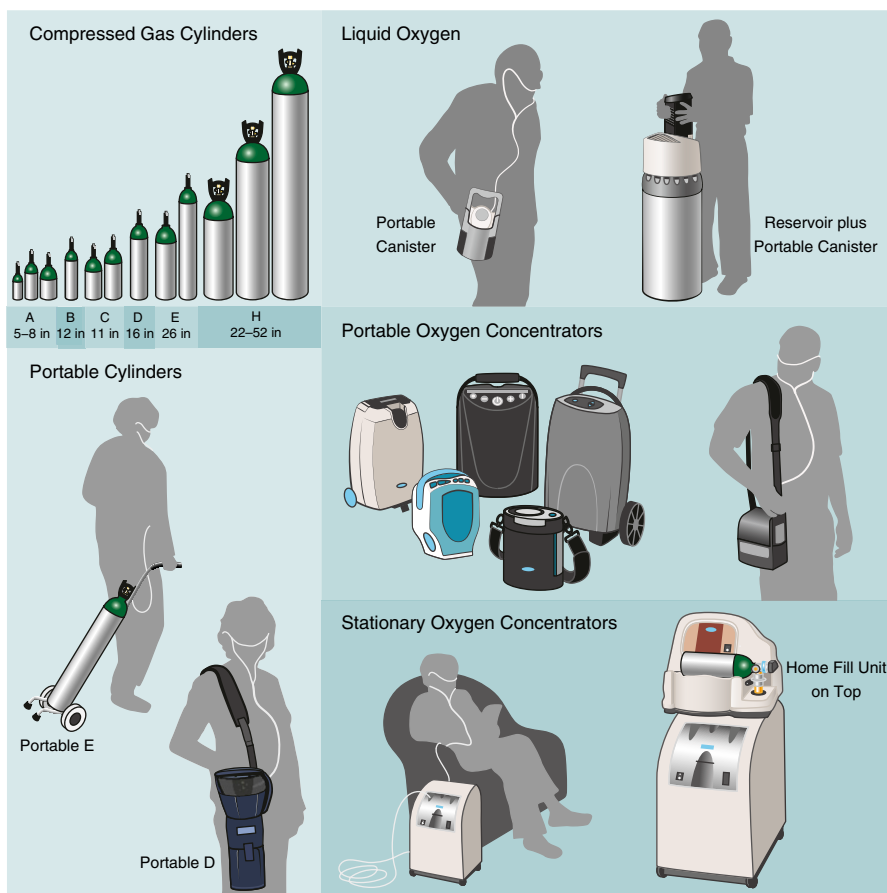

**Figure 1.** Examples of stationary and portable oxygen devices in the United States. Illustration by Patricia Ferrer Beals.

outside of the home: metal cylinders of compressed gaseous oxygen, portable oxygen concentrators, and LOX canisters (Figure 1 and Tables 6 and E11). LOX has previously been used for those with higher flow requirements of up to 15 L/min via a relatively lightweight device with a longer duration of oxygen supply to facilitate mobility and time spent outside of the home, but efficacy is unclear. Since the implementation of the Medicare National Competitive Bidding Program by the Centers for Medicare and Medicaid Services (CMS) in the United States in 2011, Medicare beneficiary claims for portable LOX declined from 966,846 in 2004 to 97,690 in 2016 (76), reflecting lower CMS reimbursement to durable medical equipment (DME) companies with subsequent elimination of LOX and transition to “nondelivery” home-fill gaseous oxygen systems (77–79) and heavier E cylinders. The impact of this decline in the availability and adequacy of portable oxygen devices in the United

States has been profound, with the overarching theme being restricted mobility and isolation due to inadequate portable options (13, 14, 16, 20, 80). The panel agreed that portable LOX for individuals requiring >3 L/min of continuous-flow oxygen was an important problem to address, both because limited mobility affects our critical outcome of HRQL and because the symptoms associated with exertional hypoxemia in patients with high-flow oxygen needs may be substantial.

The literature search did not yield any studies that met our inclusion criteria, which specified that patients be prescribed continuous oxygen flow rates of >3 L/min during exertion, so we synthesized the literature for six studies on patients with COPD (44, 46, 81–84) who had lower or unreported flow rates (Table E7). A multicenter RCT (81) compared the use of stationary oxygen concentrators (alone or in combination with small oxygen cylinders) with LOX (stationary

and portable) and found significant differences in the Sickness Impact Profile score favoring LOX for the domains of mobility (MD,  $-4.57$ ;  $P=0.043$ ), body care (MD,  $-5.83$ ;  $P=0.011$ ), ambulation (MD,  $-8.46$ ;  $P=0.017$ ), social interaction (MD,  $-5.27$ ;  $P=0.023$ ), and total score (MD,  $-3.38$ ;  $P=0.018$ ) (81) (MCID is a change of 5 U) (85). No difference in oxygen saturation was observed on the 6MWT (44, 84) or 2-minute-walk test (83) between LOX and concentrators. The Borg dyspnea score did not differ significantly after the 6MWT (MD,  $-0.10$ ; 95% CI,  $-1.23$  to  $1.03$ ) (44) or 2-minute-walk test (MD,  $-0.40$ ; 95% CI,  $-1.36$  to  $0.56$ ) (83). In adherence assessments, LOX groups used oxygen for 3 hours (95% CI,  $1.97$  to  $4.03$  h) (46) to 6.50 hours (95% CI,  $4.43$  to  $8.57$  h) (83) longer each day compared with those solely using stationary devices. LOX users spent more time outside the home than metal-cylinder users (MD, 4.0 h; 95% CI,  $0.9$  to  $7.1$  h) (82, 83) and were more likely to leave the home (83).

**Conclusions.** Despite the absence of studies examining the use of continuous-flow LOX at >3 L/min, the panel judged that the desirable consequences and benefits outweighed the undesirable consequences and harms of portable LOX therapy. This recommendation places a high value on HRQL and mobility outside of the home and places a lower value on costs and resource use. Indirect evidence demonstrated improvements in some domains of HRQL, improved adherence, and increased time spent outside the home. LOX provides opportunity for increased community mobility and participation for patients with severe hypoxemia who would otherwise be unable to leave the home. Patients who are caregivers for others, have paid employment or classroom education needs outside the home, or are attending pulmonary rehabilitation sessions to prepare for lung transplantation will have greater ability to effectively engage in such activities by having a longer duration of oxygen supply. Undesirable consequences unique to LOX included the need for the manual ability to fill portable canisters from a large reservoir and risk of skin burns from frost leaks when filling portable canisters (86).

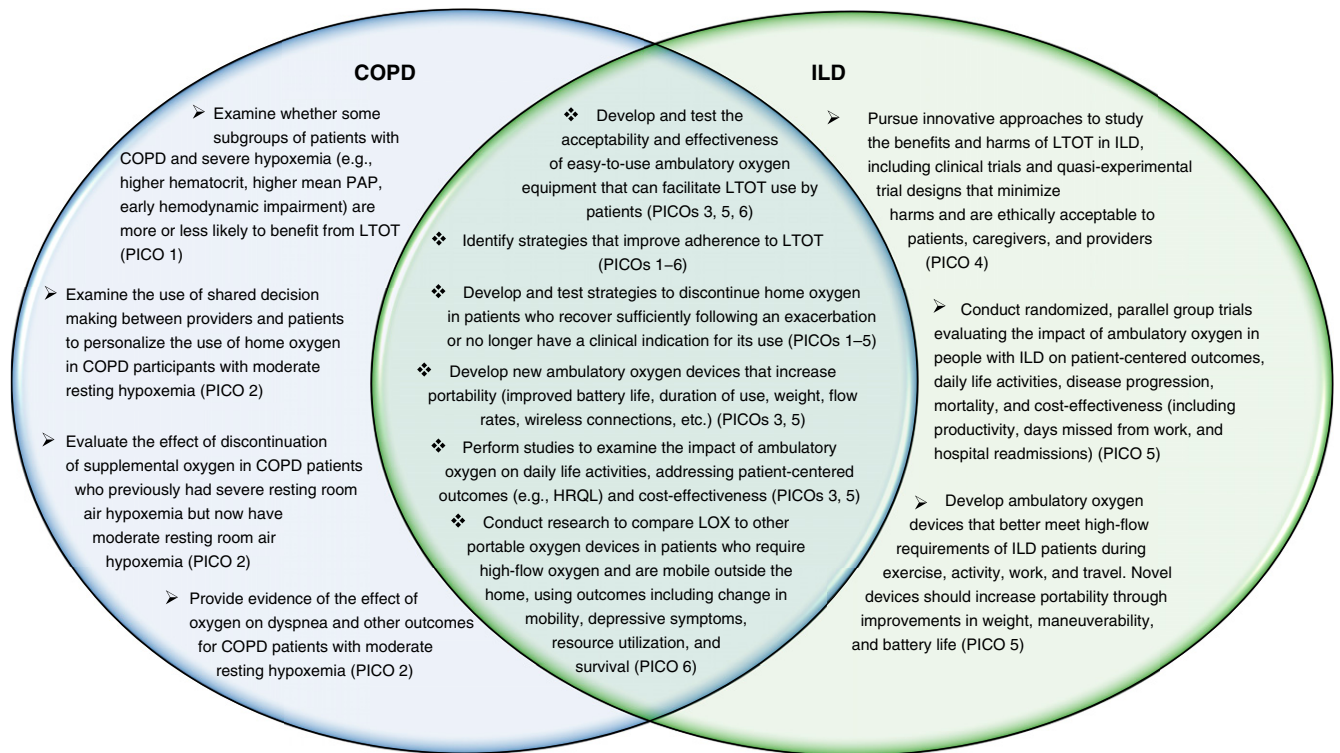

**Figure 2.** Research needs. COPD=chronic obstructive pulmonary disease; HRQL = health-related quality of life; ILD = interstitial lung disease; LOX=liquid oxygen; LTOT=long-term oxygen therapy; PAP = pulmonary arterial pressure; PICO = population, intervention, comparison, and outcome.

**ATS recommendation.** In patients with chronic lung disease who are mobile outside of the home and require continuous flow rates of >3 L/min during exertion, we suggest prescribing portable LOX (conditional recommendation, very-low-quality evidence).

**Panel Discussion**

The panel agreed that for all patients receiving home oxygen therapy, including LTOT and ambulatory-only use, there was no acceptable alternative to providing patients and their caregivers with appropriate education related to home oxygen equipment use, oxygen safety, and self-management. These were recurring topics of discussion for all questions. A best-practice statement was included to address these recommendations (Table 5).

**ATS Recommendation**

For patients prescribed home oxygen therapy, we recommend that

the patient and their caregivers receive instruction and training on the use and maintenance of all oxygen equipment and education on oxygen safety, including smoking cessation, fire prevention, and tripping hazards (best-practice statement).

**Conclusions**

Our systematic review revealed gaps in available data on the efficacy of supplemental oxygen. The need for guidance is high, given that the prescription of supplemental oxygen is common. Recommendations in this document reflect an integration of current evidence and clinical experience by a multidisciplinary expert panel. Figure 2 summarizes research needs identified by the panel.

For patients with severe resting hypoxemia, the prescription of LTOT to improve survival is supported by historical trials in patients with COPD. The panel also strongly recommends prescribing oxygen for patients with ILD with severe resting hypoxemia. Existing evidence and panel consensus suggest not prescribing LTOT for

patients with COPD with moderate resting hypoxemia. The practice of initiating short-term oxygen therapy on hospital discharge in patients with severe hypoxemia is based on indirect evidence from the NOTT and MRC clinical trial populations with chronic hypoxemia. The harms and benefits of prescribing short-term oxygen therapy on hospital discharge deserves further study. Further research is also needed on the appropriate use of shared decision-making between patients and their clinicians for decisions regarding home oxygen therapy and on approaches to discontinue home oxygen in patients who no longer have severe resting hypoxemia.

This review confirmed scarce and inconclusive data to support the prescription of oxygen in patients who desaturate (sometimes markedly) with exertion, particularly during daily life activities outside of a laboratory setting. Emerging evidence suggests that ambulatory oxygen may improve HRQL in patients with ILD in the short term, but longer-term data are needed to evaluate patient-centered outcomes. This was identified as a critical research need to create evidence-guided practice for patients with ILD, who often experience severe

exertional hypoxemia. The urgency is underscored by the treatment's cumbersome nature, associated risks, and complex effects on patients, families, and caregivers.

No studies met the panel's criteria for the investigation of the benefits of LOX for patients who use >3 L/min of continuous-flow oxygen and spend regular time outside the home. The panel concluded that although an E tank or other large metal cylinder can adequately provide oxygen at up to 5 or 6 L/min, the patient would be restricted by the need to carry multiple E tanks to leave home for anything beyond a very short time period. The panel unanimously agreed that LOX should be offered to active patients on high-flow oxygen and that policies to

accommodate this subgroup should be moved forward.

The minimal standard of care for all patients receiving home oxygen therapy must include education and training related to their oxygen equipment, oxygen safety, and self-management. Moreover, reassessment of patients' oxygen needs is critical when prescribed for severe chronic resting room air hypoxemia (after 60–90 d) and after hospital discharge after a COPD exacerbation (1–4 wk and again at 12–16 wk after hospital discharge) (12). Reassessing oxygen requirements would help to match a patient's evolving oxygen requirements with oxygen prescriptions (e.g., increase or decrease in oxygen flow rates, discontinuation), promote patient

education (e.g., how to use new equipment, how to titrate oxygen flow to changes in levels of hypoxemia), and enhance communication with other providers (e.g., primary care and home health agencies).

We urge the research community and funding agencies to work together to develop a stronger evidence base that will guide clinical practice for oxygen prescription. Of critical importance is the involvement of engineers and those in related fields who can combine creativity with applied science to develop methods of raising arterial blood oxygen content to normal levels, even during intense exercise, without the burdens associated with current oxygen delivery systems. ■

This official clinical practice guideline was prepared by an *ad hoc* subcommittee of the ATS Assembly on Nursing.

#### Members of the subcommittee are as follows:

SUSAN S. JACOBS, R.N., M.S.<sup>1</sup> (Co-Chair)  
 ANNE E. HOLLAND, P.T., PH.D.<sup>2</sup> (Co-Chair)  
 JERRY A. KRISHNAN, M.D., PH.D.<sup>3</sup> (Co-Chair)  
 DAVID J. LEDERER, M.D.<sup>4,5</sup> (Co-Chair)  
 BRIAN CARLIN, M.D.<sup>6</sup>  
 M. BRADLEY DRUMMOND, M.D., M.H.S.<sup>7</sup>  
 MAGNUS EKSTRÖM, M.D., PH.D.<sup>8</sup>  
 CHRIS GARVEY, F.N.P., M.S.N., M.P.A.<sup>9</sup>  
 MARYA GHAZIPURA, PH.D., M.S.<sup>10\*</sup>  
 BRIDGET A. GRANEY, M.D.<sup>11</sup>  
 TANZIB HOSSAIN, M.D., M.S.<sup>10‡</sup>  
 BEVERLY JACKSON, M.S.<sup>12§</sup>  
 THOMAS KALLSTROM, M.B.A., R.R.T.<sup>13</sup>  
 SHANDRA L. KNIGHT, M.S.<sup>14§||</sup>  
 KATHLEEN LINDELL, PH.D., R.N.<sup>15</sup>  
 VALENTIN PRIETO-CENTURION, M.D.<sup>3</sup>  
 ELISABETTA A. RENZONI, M.D., PH.D.<sup>16</sup>  
 CHRISTOPHER J. RYERSON, M.D., M.A.S.<sup>17</sup>  
 ANN SCHNEIDMAN, M.S., C.N.S., C.H.P.N.<sup>18</sup>  
 JEFFREY SWIGRIS, D.O., M.S.<sup>14</sup>  
 AI-YUI M. TAN, M.D.<sup>3‡</sup>  
 DONA UPSON, M.D., M.A.<sup>19</sup>

\*Lead methodologist.

‡Methodologist.

§Patient representative.

||Medical librarian.

<sup>1</sup>Stanford University, Stanford, California; <sup>2</sup>Alfred Health, Monash University, Melbourne, Victoria, Australia; <sup>3</sup>University of Illinois at Chicago, Chicago, Illinois; <sup>4</sup>Regeneron Pharmaceuticals, Inc., Tarrytown, New York; <sup>5</sup>Columbia University, New York, New York; <sup>6</sup>Sleep Medicine and Lung Health Consultants, Sewickley, Pennsylvania; <sup>7</sup>University of North Carolina at Chapel Hill,

Chapel Hill, North Carolina; <sup>8</sup>Lund University, Lund, Sweden; <sup>9</sup>University of California, San Francisco, San Francisco, California; <sup>10</sup>New York University Langone Health, New York University, New York, New York; <sup>11</sup>Anschutz Medical Campus, University of Colorado, Aurora, Colorado; <sup>12</sup>LAM Foundation, Cincinnati, Ohio; <sup>13</sup>American Association for Respiratory Care, Irving, Texas; <sup>14</sup>National Jewish Health, Denver, Colorado; <sup>15</sup>University of Pittsburgh, Pittsburgh, Pennsylvania; <sup>16</sup>Royal Brompton Hospital, London, United Kingdom; <sup>17</sup>University of British Columbia, Vancouver, British Columbia, Canada; <sup>18</sup>Hospice of the Valley, Phoenix, Arizona; and <sup>19</sup>New Mexico Veterans Affairs Health Care System, Albuquerque, New Mexico

**Author Disclosures:** S.S.J. served on an advisory committee for the Pulmonary Fibrosis Foundation. A.E.H. served as a speaker for AstraZeneca and received research support from Air Liquide and Linde Healthcare. J.A.K. served on a data safety and monitoring board for Sanofi and received research support from Inogen, Patient-Centered Outcomes Research Institute, and ResMed. D.J.L. served on an advisory committee for Boehringer Ingelheim, Fibrogen, Galapagos, Genentech/Roche, and VeracYTE; served as a consultant for Fibrogen, Galapagos, Galecto, Genentech/Roche, Patara, the Pulmonary Fibrosis Foundation, Sanofi, and VeracYTE; received research support from Boehringer Ingelheim, Fibrogen, and Global Blood Therapeutics; and is an employee of and owns stock and stock options with Regeneron. B.C. served on an advisory committee for AstraZeneca, GlaxoSmithKline, Monaghan, and Sunovion; served as a consultant for GlaxoSmithKline and Monaghan; and served as a speaker for GlaxoSmithKline, Monaghan, and Sunovion. M.B.D. served on an advisory committee for AstraZeneca, Boehringer

Ingelheim, GlaxoSmithKline, and Mylan; served as a consultant for AstraZeneca, Enterprise Therapeutics, GlaxoSmithKline, NovaVax, Parion, Philips Respironics, and Theravance; received research support from Boehringer Ingelheim; and received author royalties from Karger Publishing. C.G. served on an advisory committee, as a consultant, and as a speaker for Boehringer Ingelheim. V.P.-C. received research support from ResMed and is an employee of Vertex. E.A.R. served on an advisory committee for Roche; served as a speaker for Boehringer Ingelheim, Mundipharma, and Roche; and received travel support from Boehringer Ingelheim. C.J.R. served on an advisory committee for Boehringer Ingelheim and received research support from and served as a speaker for Boehringer Ingelheim and Roche. J.S. served as a consultant for Boehringer Ingelheim; served on an advisory committee, served as a speaker for, and received research support from Boehringer Ingelheim and Genentech; and served on the board of directors and has an intellectual property/patent unsold for Live Fully, Inc. M.E., M.G., B.A.G., T.H., B.J., T.K., S.L.K., K.L., A.S., A.-Y.M.T., and D.U. reported no relationships with relevant commercial interests.

**Acknowledgment:** The guideline panel thanks the ATS staff for their organization and support, which was critical to this project's completion and success. The authors also thank panel member Ms. Beverly Jackson for her insightful contributions as an oxygen user and as an advocate for those using home oxygen. The panel thanks the LOTT authors' sharing of their important data on patients with exertion-only hypoxemia and thanks the authors of the Moore and colleagues 2011 study (39) for providing additional study information.

## References

- Doherty DE, Petty TL, Bailey W, Carlin B, Cassaburi R, Christopher K, *et al.* Recommendations of the 6th long-term oxygen therapy consensus conference. *Respir Care* 2006;51:519–525.
- Croxton TL, Bailey WC. Long-term oxygen treatment in chronic obstructive pulmonary disease: recommendations for future research: an NHLBI workshop report. *Am J Respir Crit Care Med* 2006;174:373–378.
- Nocturnal Oxygen Therapy Trial Group. Continuous or nocturnal oxygen therapy in hypoxemic chronic obstructive lung disease: a clinical trial. *Ann Intern Med* 1980;93:391–398.
- Stuart-Harris C. Long term domiciliary oxygen therapy in chronic hypoxic cor pulmonale complicating chronic bronchitis and emphysema: report of the Medical Research Council Working Party. *Lancet* 1981;1:681–686.
- Albert RK, Au DH, Blackford AL, Casaburi R, Cooper JA Jr, Criner GJ, *et al.*; Long-Term Oxygen Treatment Trial Research Group. A randomized trial of long-term oxygen for COPD with moderate desaturation. *N Engl J Med* 2016;375:1617–1627.
- Raghu G, Collard HR, Egan JJ, Martinez FJ, Behr J, Brown KK, *et al.*; ATS/ERS/JRS/ALAT Committee on Idiopathic Pulmonary Fibrosis. An official ATS/ERS/JRS/ALAT statement: idiopathic pulmonary fibrosis: evidence-based guidelines for diagnosis and management. *Am J Respir Crit Care Med* 2011;183:788–824.
- Hardinge M, Suntharalingam J, Wilkinson T; British Thoracic Society. Guideline update: the British Thoracic Society Guidelines on home oxygen use in adults. *Thorax* 2015;70:589–591.
- Bradley B, Branley HM, Egan JJ, Greaves MS, Hansell DM, Harrison NK, *et al.*; British Thoracic Society Interstitial Lung Disease Guideline Group, British Thoracic Society Standards of Care Committee; Thoracic Society of Australia; New Zealand Thoracic Society; Irish Thoracic Society. Interstitial lung disease guideline: the British Thoracic Society in collaboration with the Thoracic Society of Australia and New Zealand and the Irish Thoracic Society. *Thorax* 2008;63:v1–v58.
- McDonald CF, Whyte K, Jenkins S, Serginson J, Frith P. Clinical practice guideline on adult domiciliary oxygen therapy: executive summary from the Thoracic Society of Australia and New Zealand. *Respirology* 2016;21:76–78.
- Lacasse Y, Bernard S, Maltais F. Eligibility for home oxygen programs and funding across Canada. *Can Respir J* 2015;22:324–330.
- Qaseem A, Wilt TJ, Weinberger SE, Hanania NA, Criner G, van der Molen T, *et al.*; American College of Physicians; American College of Chest Physicians; American Thoracic Society; European Respiratory Society. Diagnosis and management of stable chronic obstructive pulmonary disease: a clinical practice guideline update from the American College of Physicians, American College of Chest Physicians, American Thoracic Society, and European Respiratory Society. *Ann Intern Med* 2011;155:179–191.
- Global Initiative for Chronic Obstructive Lung Disease (GOLD). Global strategy for the diagnosis, management, and prevention of chronic obstructive pulmonary disease (2020 report). Fontana, WI: Global Initiative for Chronic Obstructive Lung Disease; 2020 [accessed 2020 Jul 16]. Available from: [https://goldcopd.org/wp-content/uploads/2019/12/GOLD-2020-FINAL-ver1.2-03Dec19\\_WMV.pdf](https://goldcopd.org/wp-content/uploads/2019/12/GOLD-2020-FINAL-ver1.2-03Dec19_WMV.pdf).
- Jacobs SS, Lindell KO, Collins EG, Garvey CM, Hernandez C, McLaughlin S, *et al.* Patient perceptions of the adequacy of supplemental oxygen therapy. Results of the American Thoracic Society Nursing Assembly Oxygen Working Group Survey. *Ann Am Thorac Soc* 2018;15:24–32.
- AlMutairi HJ, Mussa CC, Lambert CT, Vines DL, Strickland SL. Perspectives from COPD subjects on portable long-term oxygen therapy devices. *Respir Care* 2018;63:1321–1330.
- Dobson A, Heath S, Kilby D, Hu J, DaVanzo JE. Access to home medical equipment: survey of beneficiary, case manager and supplier experiences—understanding the impact of competitive bidding. Vienna, VA: Dobson DaVanzo & Associates; 2017 [accessed 2017 Oct 10]. Available from: [https://s3.amazonaws.com/aafh/downloads/1287/Dobson\\_DaVanzo\\_Patient\\_Access\\_Survey\\_Final\\_Report\\_10.11.17\\_FINAL.pdf?1507750324](https://s3.amazonaws.com/aafh/downloads/1287/Dobson_DaVanzo_Patient_Access_Survey_Final_Report_10.11.17_FINAL.pdf?1507750324).
- Lindell KO, Collins EG, Catanzarite L, Garvey CM, Hernandez C, McLaughlin S, *et al.* Equipment, access and worry about running short of oxygen: key concerns in the ATS patient supplemental oxygen survey. *Heart Lung* 2019;48:245–249.
- Swigris J. Caution against extrapolating results from the trial of long-term oxygen for chronic obstructive pulmonary disease. *Ann Am Thorac Soc* 2017;14:296.
- Du Plessis JP, Fernandes S, Jamal R, Camp P, Johannson K, Schaeffer M, *et al.* Exertional hypoxemia is more severe in fibrotic interstitial lung disease than in COPD. *Respirology* 2018;23:392–398.
- Ekström M, Ahmadi Z, Larsson H, Nilsson T, Wahlberg J, Ström KE, *et al.* A nationwide structure for valid long-term oxygen therapy: 29-year prospective data in Sweden. *Int J Chron Obstruct Pulmon Dis* 2017;12:3159–3169.
- Jacobs SS, Lederer DJ, Garvey CM, Hernandez C, Lindell KO, McLaughlin S, *et al.* Optimizing home oxygen therapy: an official American Thoracic Society workshop report. *Ann Am Thorac Soc* 2018;15:1369–1381.
- Guyatt GH, Oxman AD, Vist GE, Kunz R, Falck-Ytter Y, Alonso-Coello P, *et al.*; GRADE Working Group. GRADE: an emerging consensus on rating quality of evidence and strength of recommendations. *BMJ* 2008;336:924–926.
- Lacasse Y, Tan AM, Maltais F, Krishnan JA. Home oxygen in chronic obstructive pulmonary disease. *Am J Respir Crit Care Med* 2018;197:1254–1264.
- Levine BE, Bigelow DB, Hamstra RD, Beckwitt HJ, Mitchell RS, Nett LM, *et al.* The role of long-term continuous oxygen administration in patients with chronic airway obstruction with hypoxemia. *Ann Intern Med* 1967;66:639–650.
- Bao H, Wang J, Zhou D, Han Z, Zhang Y, Su L, *et al.* Community physician-guided long-term domiciliary oxygen therapy combined with conventional therapy in stage IV COPD patients. *Rehabil Nurs* 2017;42:268–273.
- Crockett AJ, Moss JR, Cranston JM, Alpers JH. The effects of home oxygen therapy on hospital admission rates in chronic obstructive airways disease. *Monaldi Arch Chest Dis* 1993;48:445–446.
- Tanash HA, Huss F, Ekström M. The risk of burn injury during long-term oxygen therapy: a 17-year longitudinal national study in Sweden. *Int J Chron Obstruct Pulmon Dis* 2015;10:2479–2484.
- Sharma G, Meena R, Goodwin JS, Zhang W, Kuo YF, Duarte AG. Burn injury associated with home oxygen use in patients with chronic obstructive pulmonary disease. *Mayo Clin Proc* 2015;90:492–499.
- Lacasse Y, LaForge J, Maltais F. Got a match? Home oxygen therapy in current smokers. *Thorax* 2006;61:374–375.
- Medicare.gov. Your Medicare coverage: oxygen equipment and accessories. Lawrence, KS: Medicare.gov; 2020 [accessed 2020 Jul 16]. Available from: <https://www.medicare.gov/coverage/oxygen-equipment-accessories>.
- Oba Y. Cost-effectiveness of long-term oxygen therapy for chronic obstructive disease. *Am J Manag Care* 2009;15:97–104.
- Saskatchewan Aids to Independent Living (SAIL). Universal benefits program. Government of Saskatchewan; 2019 [accessed 2020 Oct 14]. Available from: <https://www.saskatchewan.ca/residents/health/accessing-health-care-services/health-services-for-people-with-disabilities/sail#universal-benefits-programs>.
- Government of Alberta. Alberta health: Alberta aids to daily living—general policy and procedures manual. [accessed 2017 Apr]. Edmonton, AB, Canada: Government of Alberta; 2017. Available from: <https://open.alberta.ca/dataset/8476d5ff-7280-495f-a858-f14286566406/resource/0b2d2918-5660-4af5-b5ed-1b844bc5fb22/download/aadl-policy-procedures.pdf>.
- Foo J, Landis SH, Maskell J, Oh YM, van der Molen T, Han MK, *et al.* Continuing to confront COPD international patient Survey: economic impact of COPD in 12 countries. *PLoS One* 2016;11:e0152618.
- Górecka D, Gorzelak K, Sliwiński P, Tobiasz M, Zieliński J. Effect of long-term oxygen therapy on survival in patients with chronic obstructive pulmonary disease with moderate hypoxaemia. *Thorax* 1997;52:674–679.

35. Light RW, Mahutte CK, Stansbury DW, Fischer CE, Brown SE. Relationship between improvement in exercise performance with supplemental oxygen and hypoxic ventilatory drive in patients with chronic airflow obstruction. *Chest* 1989;95:751–756.
36. Eaton T, Garrett JE, Young P, Fergusson W, Kolbe J, Rudkin S, et al. Ambulatory oxygen improves quality of life of COPD patients: a randomised controlled study. *Eur Respir J* 2002;20:306–312.
37. Jarosch I, Gloeckl R, Damm E, Schwedhelm AL, Buhrow D, Jerrentrup A, et al. Short-term effects of supplementary oxygen on 6-min walk test outcomes in patients with COPD: a randomized, placebo-controlled, single-blind, crossover trial. *Chest* 2017;151:795–803.
38. Mitlehner W, Kerb W. Exercise hypoxemia and the effects of increased inspiratory oxygen concentration in severe chronic obstructive pulmonary disease. *Respiration* 1994;61:255–262.
39. Moore RP, Berlowitz DJ, Denehy L, Pretto JJ, Brazzale DJ, Sharpe K, et al. A randomised trial of domiciliary, ambulatory oxygen in patients with COPD and dyspnoea but without resting hypoxaemia. *Thorax* 2011;66:32–37.
40. Nonoyama ML, Brooks D, Guyatt GH, Goldstein RS. Effect of oxygen on health quality of life in patients with chronic obstructive pulmonary disease with transient exertional hypoxemia. *Am J Respir Crit Care Med* 2007;176:343–349.
41. Porszasz J, Cao R, Morishige R, van Eykern LA, Stenzler A, Casaburi R. Physiologic effects of an ambulatory ventilation system in chronic obstructive pulmonary disease. *Am J Respir Crit Care Med* 2013;188:334–342.
42. Leggett RJ, Flenley DC. Portable oxygen and exercise tolerance in patients with chronic hypoxic cor pulmonale. *BMJ* 1977;2:84–86.
43. McKeon JL, Tomlinson JC, Tarrant EP, Mitchell CA. Portable oxygen in patients with severe chronic obstructive pulmonary disease. *Aust N Z J Med* 1988;18:125–129.
44. Nasilowski J, Przybylowski T, Zielinski J, Chazan R. Comparing supplementary oxygen benefits from a portable oxygen concentrator and a liquid oxygen portable device during a walk test in COPD patients on long-term oxygen therapy. *Respir Med* 2008;102:1021–1025.
45. O'Donnell DE, D'Arsigny C, Webb KA. Effects of hyperoxia on ventilatory limitation during exercise in advanced chronic obstructive pulmonary disease. *Am J Respir Crit Care Med* 2001;163:892–898.
46. Vergeret J, Brambilla C, Mounier L. Portable oxygen therapy: use and benefit in hypoxaemic COPD patients on long-term oxygen therapy. *Eur Respir J* 1989;2:20–25.
47. Jones PW, Beeh KM, Chapman KR, Decramer M, Mahler DA, Wedzicha JA. Minimal clinically important differences in pharmacological trials. *Am J Respir Crit Care Med* 2014;189:250–255.
48. Wyrwich KW, Tierney WM, Babu AN, Kroenke K, Wolinsky FD. A comparison of clinically important differences in health-related quality of life for patients with chronic lung disease, asthma, or heart disease. *Health Serv Res* 2005;40:577–591.
49. Ries AL. Minimally clinically important difference for the UCSD Shortness of Breath Questionnaire, Borg scale, and visual analog scale. *COPD* 2005;2:105–110.
50. Garrod R, Paul EA, Wedzicha JA. Supplemental oxygen during pulmonary rehabilitation in patients with COPD with exercise hypoxaemia. *Thorax* 2000;55:539–543.
51. Lacasse Y, Lecours R, Pelletier C, Bégin R, Maltais F. Randomised trial of ambulatory oxygen in oxygen-dependent COPD. *Eur Respir J* 2005;25:1032–1038.
52. Arnold E, Bruton A, Donovan-Hall M, Fenwick A, Dibb B, Walker E. Ambulatory oxygen: why do COPD patients not use their portable systems as prescribed? A qualitative study. *BMC Pulm Med* 2011;11:9.
53. Kelly CA, Lynes D, O'Brien MR, Shaw B. A wolf in sheep's clothing? Patients' and healthcare professionals' perceptions of oxygen therapy: an interpretative phenomenological analysis. *Clin Respir J* 2018;12:616–632.
54. Petty TL, Bliss PL. Ambulatory oxygen therapy, exercise, and survival with advanced chronic obstructive pulmonary disease (the Nocturnal Oxygen Therapy Trial revisited). *Respir Care* 2000;45:204–211. [Discussion, pp. 211–213.]
55. Ekström M. Why treatment efficacy on breathlessness in laboratory but not daily life trials? The importance of standardized exertion. *Curr Opin Support Palliat Care* 2019;13:179–183.
56. Ekström M, Ringbaek T. Which patients with moderate hypoxemia benefit from long-term oxygen therapy? Ways forward. *Int J Chron Obstruct Pulmon Dis* 2018;13:231–235.
57. Crockett AJ, Cranston JM, Antic N. Domiciliary oxygen for interstitial lung disease. *Cochrane Database Syst Rev* 2001;(3):CD002883.
58. Lv H, Liu J, Pan Q, Cai R, Zhang J. Clinical retrospective analysis of interstitial lung disease patients associated with pulmonary hypertension. *Med Sci Monit* 2019;25:7763–7769.
59. Nemoto K, Oh-Ishi S, Akiyama T, Yabuuchi Y, Goto H, Nonaka M, et al. Borderline pulmonary hypertension is associated with exercise intolerance and increased risk for acute exacerbation in patients with interstitial lung disease. *BMC Pulm Med* 2019;19:167.
60. King CS, Nathan SD. Pulmonary hypertension due to interstitial lung disease. *Curr Opin Pulm Med* 2019;25:459–467.
61. Graney BA, Wamboldt FS, Baird S, Churney T, Fier K, Korn M, et al. Looking ahead and behind at supplemental oxygen: a qualitative study of patients with pulmonary fibrosis. *Heart Lung* 2017;46:387–393.
62. Raghu G, Rochwerf B, Zhang Y, Garcia CA, Azuma A, Behr J, et al.; American Thoracic Society; European Respiratory Society; Japanese Respiratory Society; Latin American Thoracic Association. An official ATS/ERS/JRS/ALAT clinical practice guideline: treatment of idiopathic pulmonary fibrosis: an update of the 2011 clinical practice guideline. *Am J Respir Crit Care Med* 2015;192:e3–e19. [Published erratum appears in *Am J Respir Crit Care Med* 192:644.]
63. Visca D, Mori L, Tsipouri V, Fleming S, Firouzi A, Bonini M, et al. Effect of ambulatory oxygen on quality of life for patients with fibrotic lung disease (AmbOx): a prospective, open-label, mixed-method, crossover randomised controlled trial. *Lancet Respir Med* 2018;6:759–770.
64. Nolan CM, Birring SS, Maddocks M, Maher TM, Patel S, Barker RE, et al. King's Brief Interstitial Lung Disease Questionnaire: responsiveness and minimum clinically important difference. *Eur Respir J* 2019;54:1900281.
65. Sinha A, Patel AS, Siegert RJ, Bajwah S, Maher TM, Renzoni EA, et al. The King's Brief Interstitial Lung Disease (KBILD) Questionnaire: an updated minimal clinically important difference. *BMJ Open Respir Res* 2019;6:e000363.
66. Jones PW. St. George's Respiratory Questionnaire: MCID. *COPD* 2005;2:75–79.
67. Kupferberg DH, Kaplan RM, Slymen DJ, Ries AL. Minimal clinically important difference for the UCSD Shortness of Breath Questionnaire. *J Cardiopulm Rehabil* 2005;25:370–377.
68. Sharp C, Adamali H, Millar AB. Ambulatory and short-burst oxygen for interstitial lung disease. *Cochrane Database Syst Rev* 2016;7:CD011716.
69. Arizono S, Taniguchi H, Sakamoto K, Kondoh Y, Kimura T, Kataoka K, et al. Benefits of supplemental oxygen on exercise capacity in IPF patients with exercise-induced hypoxemia. *Eur Respir J* 2015;46:OA4971.
70. Khor YH, McDonald CF, Hazard A, Symons K, Westall G, Glaspole I, et al. Portable oxygen concentrators versus oxygen cylinder during walking in interstitial lung disease: a randomized crossover trial. *Respirology* 2017;22:1598–1603.
71. Nishiyama O, Miyajima H, Fukai Y, Yamazaki R, Satoh R, Yamagata T, et al. Effect of ambulatory oxygen on exertional dyspnea in IPF patients without resting hypoxemia. *Respir Med* 2013;107:1241–1246.
72. Harris-Eze AO, Sridhar G, Clemens RE, Zintel TA, Gallagher CG, Marciniuk DD. Role of hypoxemia and pulmonary mechanics in exercise limitation in interstitial lung disease. *Am J Respir Crit Care Med* 1996;154:994–1001.
73. Troy L, Young I, Munoz P, Taylor N, Webster S, Lau E, et al. Does supplemental oxygen increase exercise endurance in patients with idiopathic pulmonary fibrosis? *Respirology* 2014;19:95.
74. Khor YH, Goh NSL, McDonald CF, Holland AE. Oxygen therapy for interstitial lung disease: a mismatch between patient expectations and experiences. *Ann Am Thorac Soc* 2017;14:888–895.

75. Graney BA, Wamboldt FS, Baird S, Churney T, Fier K, Korn M, *et al*. Informal caregivers experience of supplemental oxygen in pulmonary fibrosis. *Health Qual Life Outcomes* 2017;15:133.
76. U.S. COPD Coalition. Patient provider comments to CMS re DME oxygen. Union, ME: U.S. COPD Coalition; 2018 [updated 2019 Sep 11; accessed 2019 Sep 11]. Available from: <https://uscopdcoalition.org/wp-content/uploads/2020/06/Patient-Provider-Comments-to-CMS-re-DME-Oxygen-9-6-18.pdf>.
77. The National Association for Medical Direction of Respiratory Care. Medicare competitive bidding and the supplemental oxygen benefit: how a benefit mired in decades old policy is woven into a new delivery model. *Washington Watchline* 2013;23:1–9.
78. Kacik A; Modern Healthcare. Competitive bidding nets up to \$26 billion in savings on medical equipment. Detroit, MI: Crain Communications; 2017 [accessed 2020 Jul 16]. Available from: <https://www.modernhealthcare.com/article/20170808/NEWS/170809907/competitive-bidding-nets-up-to-26-billion-in-savings-on-medical-equipment>.
79. Centers for Medicare and Medicaid Services. CMS awards contracts for the DMEPOS competitive bidding program round 2 recompetes and national mail-order recompetes. Baltimore, MD: Centers for Medicare and Medicaid Services; 2016 [accessed 2020 Jul 16]. CMS Fact Sheet, CMS Media Relations. Available from: <https://www.cms.gov/Medicare/Medicare-Fee-for-Service-Payment/DMEPOSCompetitiveBid/Electronic-Mailing-List-Message-Archive-Items/2016-03-15-DMEPOS-Suppliers.html>.
80. Hanlon P. CMS cuts detrimental to home oxygen patients, industry. *RT Magazine* 2016 July 31 [accessed 2016 Jul]. Available from: <http://www.rtmagazine.com/2016/07/cms-cuts-detrimental-home-oxygen-patients-industry/>.
81. Andersson A, Ström K, Brodin H, Alton M, Boman G, Jakobsson P, *et al*. Domiciliary liquid oxygen versus concentrator treatment in chronic hypoxaemia: a cost-utility analysis. *Eur Respir J* 1998;12:1284–1289.
82. Lock SH, Blower G, Prynne M, Wedzicha JA. Comparison of liquid and gaseous oxygen for domiciliary portable use. *Thorax* 1992;47:98–100.
83. Su C-L, Lee C-N, Chen H-C, Feng L-P, Lin H-W, Chiang L-L. Comparison of domiciliary oxygen using liquid oxygen and concentrator in northern Taiwan. *J Formos Med Assoc* 2014;113:23–32.
84. Strickland SL, Hogan TM, Hogan RG, Sohal HS, McKenzie WN, Petroski GF. A randomized multi-arm repeated-measures prospective study of several modalities of portable oxygen delivery during assessment of functional exercise capacity. *Respir Care* 2009;54:344–349.
85. MacKenzie CR, Charlson ME, DiGioia D, Kelley K. Can the Sickness Impact Profile measure change? An example of scale assessment. *J Chronic Dis* 1986;39:429–438.
86. Apria Healthcare. Patient/caregiver instructions: liquid oxygen. Morrisville, NC: Apria Healthcare; 2016 [accessed 2019 Oct 29]. Available from: [https://www.apria.com/wp-content/uploads/RES-2002\\_Manual\\_Liquid-Oxygen\\_01-16\\_v21\\_ONLINE.pdf](https://www.apria.com/wp-content/uploads/RES-2002_Manual_Liquid-Oxygen_01-16_v21_ONLINE.pdf).
87. McCoy RW. Options for home oxygen therapy equipment: storage and metering of oxygen in the home. *Respir Care* 2013;58:65–85.
88. Gloeckl R, Osadnik C, Bies L, Leitl D, Koczulla AR, Kenn K. Comparison of continuous flow versus demand oxygen delivery systems in patients with COPD: a systematic review and meta-analysis. *Respirology* 2019;24:329–337.
89. Carlin B, McCoy R, Diesem R. 2 is not 2 is not 2. *Respir Ther* 2018;13:29–32.
90. Branson RD, King A, Giordano SP. Home oxygen therapy devices: providing the prescription. *Respir Care* 2019;64:230–232.
91. Chen JZ, Katz IM, Pichelin M, Zhu K, Caillibotte G, Finlay WH, *et al*. *In vitro-in silico* comparison of pulsed oxygen delivery from portable oxygen concentrators versus continuous flow oxygen delivery. *Respir Care* 2019;64:117–129.
92. Federal Aviation Administration. Acceptance criteria for portable oxygen concentrators. Washington, DC: Federal Aviation Administration; 2015; [accessed 2019 Aug 9]. Available from: [https://www.faa.gov/about/initiatives/cabin\\_safety/portable\\_oxygen/](https://www.faa.gov/about/initiatives/cabin_safety/portable_oxygen/).
93. Hardinge M, Annandale J, Bourne S, Cooper B, Evans A, Freeman D, *et al*.; British Thoracic Society Home Oxygen Guideline Development Group; British Thoracic Society Standards of Care Committee. British Thoracic Society guidelines for home oxygen use in adults. *Thorax* 2015;70:i1–i43.
94. Lacasse Y, Légaré M, Maltais F. E-cigarette use in patients receiving home oxygen therapy. *Can Respir J* 2015;22:83–85.
95. Eaton TE, Grey C, Garrett JE. An evaluation of short-term oxygen therapy: the prescription of oxygen to patients with chronic lung disease hypoxic at discharge from hospital. *Respir Med* 2001;95:582–587.
96. Wiener RS, Ouellette DR, Diamond E, Fan VS, Maurer JR, Mularski RA, *et al*. An official American Thoracic Society/American College of Chest Physicians policy statement: the Choosing Wisely top five list in adult pulmonary medicine. *Chest* 2014;145:1383–1391.
